# Supplementary material for: Quantitative acetylome analysis reveals histone modifications that may predict prognosis in hepatitis B‐related hepatocellular carcinoma
Source: PubMed Central journal article supplement (PMC7939233; doi:10.1002/ctm2.313), 2021-03-08

**A**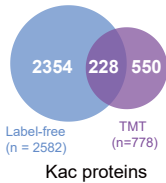**B**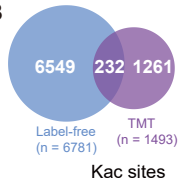

Supplement: CTM2-11-e313-s012.pdf [file CTM2-11-e313-s012.pdf]
